# Supplementary material for: Helicobacter pylori Eradication Therapy for Functional Dyspepsia: A Meta-Analysis by Region and H. pylori Prevalence
Source: PubMed Central journal article supplement (PMC6780123; doi:10.3390/jcm8091324), 2019-08-28
Supplement: jcm-08-01324-s001.pdf [file jcm-08-01324-s001.pdf]

**Table S1.** The excluded articles and the reason of exclusion (Articles previously analyzed in other meta-analysis).

| <b>Articles</b>      | <b>The Reason of Exclusion</b>                                     | <b>Criteria for this Meta-Analysis</b>             |
|----------------------|--------------------------------------------------------------------|----------------------------------------------------|
| Dhali, 1999          | Symptom assessed 12 weeks after <i>H. pylori</i> eradication       | 12 months after <i>H. pylori</i> eradication       |
| Greenberg, 1999      | Changes of dyspeptic symptom scores in each groups were presented. | Number of patients who showed symptom improvements |
| Goddard, 1999        | No control group                                                   | Randomized controlled trial                        |
| Miwa, 2000           | Symptom assessed 12 weeks after <i>H. pylori</i> eradication       | 12 months after <i>H. pylori</i> eradication       |
| Chiba, 2002          | Patients with uninvestigated dyspepsia                             | Dyspepsia investigated by endoscopy                |
| Alizadeh-Naeni, 2002 | Symptom assessed 3 months after <i>H. pylori</i> eradication       | 12 months after <i>H. pylori</i> eradication       |
| Koelz, 2003          | Symptom assessed 6 months after <i>H. pylori</i> eradication       | 12 months after <i>H. pylori</i> eradication       |
| Varasa, 2008         | Changes of dyspeptic symptom scores in each groups were presented. | Number of patients who showed symptom improvements |
| Lan, 2011            | Symptom assessed 3 months after <i>H. pylori</i> eradication       | 12 months after <i>H. pylori</i> eradication       |

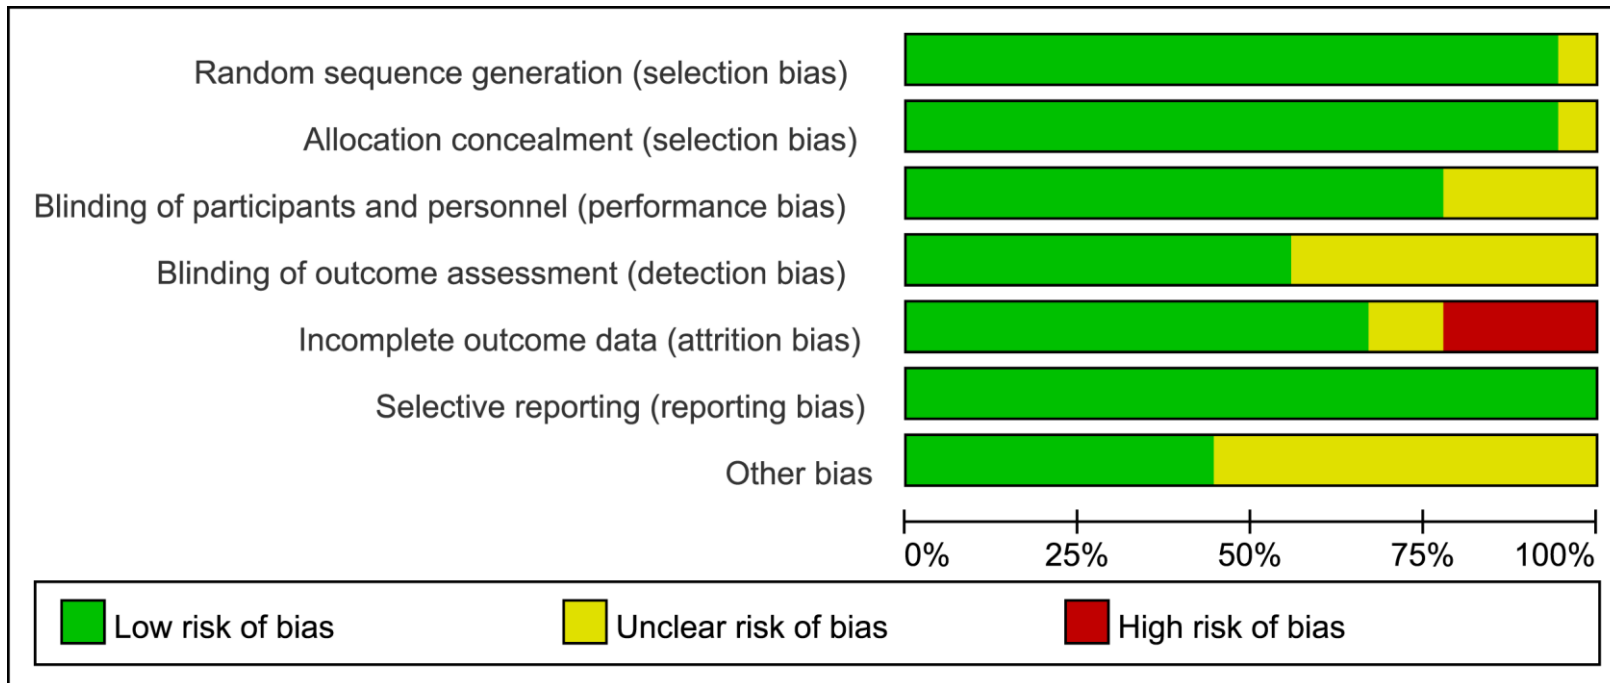

Figure S1. Summary of risk bias.

|                      | Random sequence generation (selection bias) | Allocation concealment (selection bias) | Blinding of participants and personnel (performance bias) | Blinding of outcome assessment (detection bias) | Incomplete outcome data (attrition bias) | Selective reporting (reporting bias) | Other bias |
|----------------------|---------------------------------------------|-----------------------------------------|-----------------------------------------------------------|-------------------------------------------------|------------------------------------------|--------------------------------------|------------|
| Ang 2006             | +                                           | +                                       | +                                                         | ?                                               | +                                        | +                                    | ?          |
| Blum 1998            | +                                           | +                                       | ?                                                         | ?                                               | -                                        | +                                    | ?          |
| Froehlich 2001       | +                                           | +                                       | ?                                                         | ?                                               | +                                        | +                                    | ?          |
| Gisbert 2004         | +                                           | ?                                       | ?                                                         | ?                                               | +                                        | +                                    | ?          |
| Gwee 2009            | +                                           | +                                       | +                                                         | +                                               | ?                                        | +                                    | +          |
| Hsu 2001             | +                                           | +                                       | +                                                         | +                                               | +                                        | +                                    | +          |
| Koskenpato 2001      | +                                           | +                                       | +                                                         | +                                               | +                                        | +                                    | +          |
| Malfertheiner 2003   | +                                           | +                                       | +                                                         | +                                               | -                                        | +                                    | +          |
| Mazzoleni 2006       | +                                           | +                                       | +                                                         | +                                               | +                                        | +                                    | ?          |
| Mazzoleni 2011       | +                                           | +                                       | +                                                         | +                                               | +                                        | +                                    | +          |
| McColl 1998          | +                                           | +                                       | +                                                         | ?                                               | +                                        | +                                    | ?          |
| Sodhi 2013           | +                                           | +                                       | +                                                         | +                                               | -                                        | +                                    | ?          |
| Talley 1999          | +                                           | +                                       | +                                                         | ?                                               | +                                        | +                                    | +          |
| Talley 1999 (ORCHID) | ?                                           | +                                       | +                                                         | ?                                               | -                                        | +                                    | ?          |
| Varannes 2001        | +                                           | +                                       | ?                                                         | ?                                               | +                                        | +                                    | ?          |
| Xu 2013              | +                                           | +                                       | +                                                         | +                                               | ?                                        | +                                    | ?          |
| Yazdanbod 2015       | +                                           | +                                       | +                                                         | +                                               | +                                        | +                                    | +          |
| Zanten 2003          | +                                           | +                                       | +                                                         | +                                               | +                                        | +                                    | +          |

Figure S2. Risk of bias graph of each study.

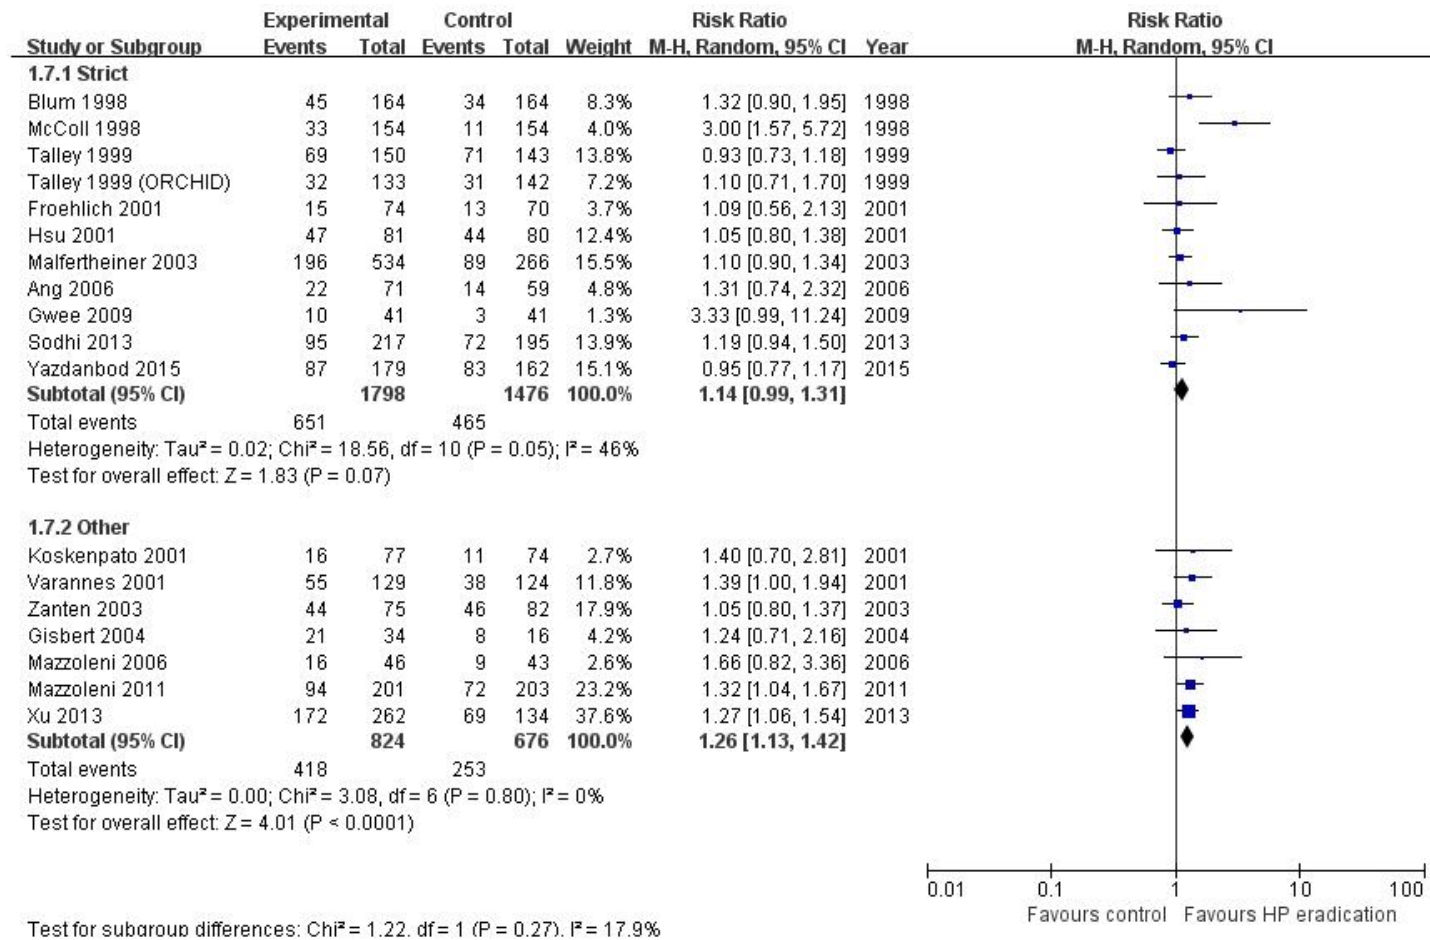

**Figure S3.** Subgroup analysis by degree of response for the effect of eradication. 1.7.1 Strict: Treatment success was defined as no or minimal dyspeptic symptoms, 1.7.2 Other: treatment success was defined as decrease or reduction of symptom score compared with baseline. CI: confidence interval.

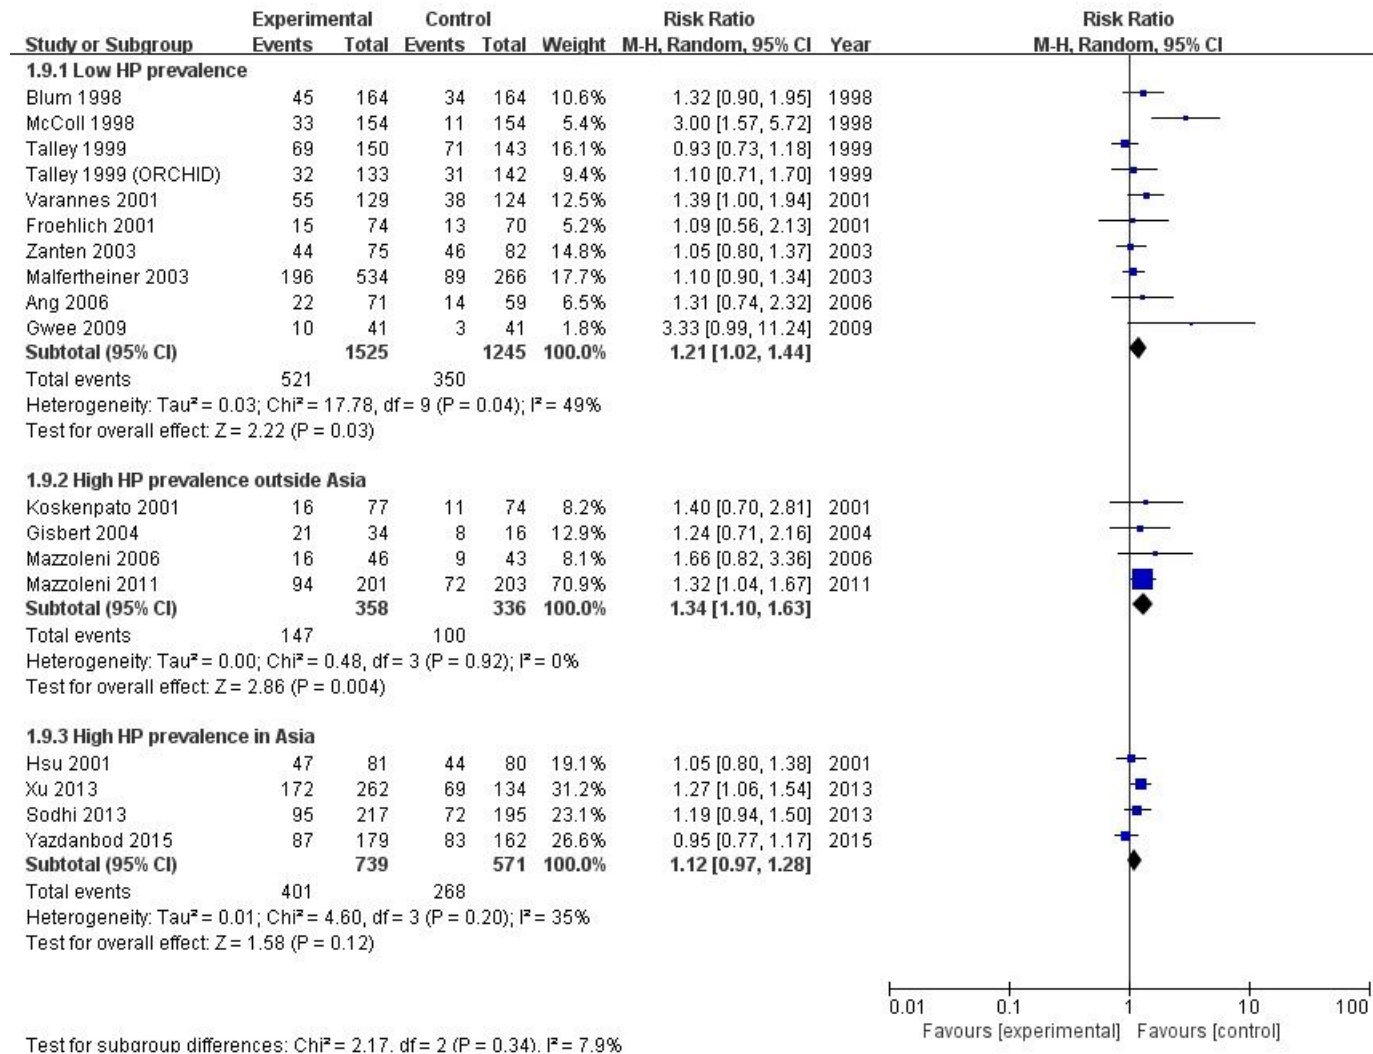

**Figure S4.** Subgroup analysis by *H. pylori* prevalence and geographical regions. 1.9.1 Low-prevalence region, 1.9.2 High-prevalence region outside Asia, 1.9.3 High-prevalence region in Asia. CI: confidence interval.
